# Supplementary material for: Origin of the decompression driven superconductivity enhancement in SnSe2
Source: Royal Society of Chemistry journal article supplement (doi:10.1039/d3tc01501g), 2023-01-01
Supplement: d3tc01501g1.pdf [file d3tc01501g1.pdf]

# Supplementary Information for: Origin of the Decompression-Driven Superconductivity Enhancement in SnSe<sub>2</sub>

Shihui Zhang,<sup>1, 2</sup> Resta A Susilo,<sup>3</sup> Shun Wan,<sup>2</sup> Wen Deng,<sup>2</sup> Bin Chen,<sup>2,\*</sup> Chunxiao Gao,<sup>1,\*</sup>

\*E-mail: shihuizhang@hpstar.ac.cn, chenbin@hpstar.ac.cn, cc060109@qq.com

*1 State Key Laboratory for Superhard Materials, Jilin University, Changchun 130012, China.*

*2 Center for High Pressure Science and Technology Advanced Research, Shanghai 201203, China*

*3 Department of Physics, Pohang University of Science and Technology, Pohang, South Korea*

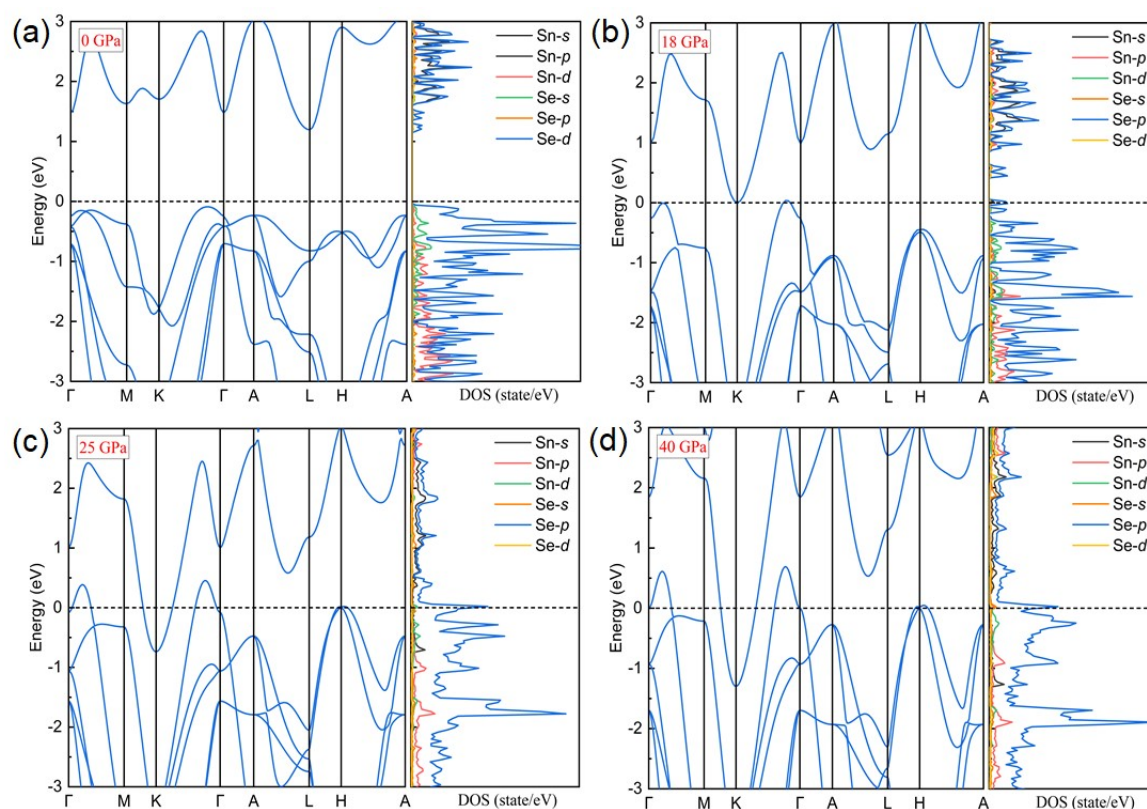

Figure S1. (a)-(d) Electronic structure and projected electronic DOS of SnSe<sub>2</sub> at representative pressures calculated through the DFT method. The electron density of the state at the Fermi level increases very fast from 18 to 25 GPa, which may significantly enhance the electron–phonon coupling ( $\lambda$ ).

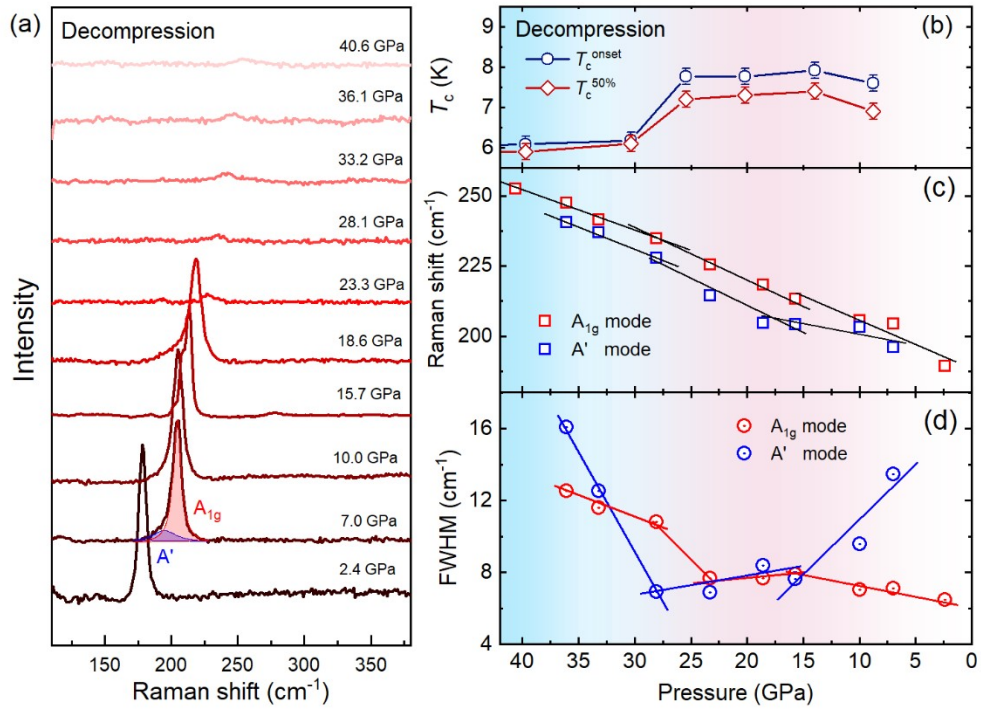

Figure S2. (a) Raman spectra of SnSe<sub>2</sub> under decompression. (b) The evolution of superconducting temperature  $T_c^{\text{onset}}$  and  $T_c^{50\%}$ . (c) Pressure dependence of Raman shift of A<sub>1g</sub> and A' modes. (d) FWHM of A<sub>1g</sub> and A' modes.
